# Supplementary material for: The complete chloroplast genome provides insight into the evolution and polymorphism of Panax ginseng
Source: Front Plant Sci. 2015 Jan 14;5:696. doi: 10.3389/fpls.2014.00696 (PMC4294130; doi:10.3389/fpls.2014.00696)
Supplement: Supplementary file 3 [file Table3.XLSX]

## Sheet: 工作表1
GI	Accession Number	Description
11465652	NC_000925.1	Porphyra purpurea chloroplast, complete genome
11467607	NC_000926.1	Guillardia theta chloroplast, complete genome
11467755	NC_000927.1	Nephroselmis olivacea chloroplast, complete genome
7525012	NC_000932.1	Arabidopsis thaliana chloroplast, complete genome
11466673	NC_001319.1	Marchantia polymorpha chloroplast, complete genome
11466763	NC_001320.1	Oryza sativa Japonica Group plastid, complete genome
11466954	NC_001568.1	Epifagus virginiana chloroplast, complete genome
30410708	NC_001603.2	Euglena gracilis chloroplast, complete genome
7524593	NC_001631.1	Pinus thunbergii chloroplast, complete genome
11994090	NC_001666.2	Zea mays chloroplast, complete genome
11467282	NC_001675.1	Cyanophora paradoxa cyanelle, complete genome
11467432	NC_001713.1	Odontella sinensis chloroplast, complete genome
11496534	NC_001799.1	Toxoplasma gondii RH apicoplast, complete genome
11465393	NC_001840.1	Cyanidium caldarium chloroplast, complete genome
7524759	NC_001865.1	Chlorella vulgaris chloroplast, complete genome
81238323	NC_001879.2	Nicotiana tabacum plastid, complete genome
11466344	NC_002186.1	Mesostigma viride chloroplast, complete genome
11497503	NC_002202.1	Spinacia oleracea plastid, complete genome
12545411	NC_002652.1	Euglena longa plastid, complete genome
164597805	NC_002693.2	Oenothera elata subsp. hookeri plastid plastome I, complete sequence
13518417	NC_002694.1	Lotus japonicus chloroplast, complete genome
14017551	NC_002762.1	Triticum aestivum chloroplast, complete genome
17570783	NC_003119.6	Medicago truncatula chloroplast, complete genome
18860289	NC_003386.1	Psilotum nudum chloroplast, complete genome
22711893	NC_004115.1	Chaetosphaeridium globosum chloroplast, complete genome
28202146	NC_004543.1	Anthoceros formosae chloroplast, complete genome
28261696	NC_004561.1	Atropa belladonna chloroplast, complete genome
145408420	NC_004677.2	Pinus koraiensis chloroplast, complete genome
30352011	NC_004766.1	Adiantum capillus-veneris chloroplast, complete genome
30468047	NC_004799.1	Cyanidioschyzon merolae strain 10D chloroplast, complete genome
31442363	NC_004823.1	Eimeria tenella strain Penn State apicoplast, complete genome
32480822	NC_004993.1	Calycanthus floridus var. glaucus chloroplast, complete genome
34500893	NC_005086.1	Amborella trichopoda chloroplast, complete genome
34501376	NC_005087.1	Physcomitrella patens subsp. patens chloroplast, complete genome
41179002	NC_005353.1	Chlamydomonas reinhardtii chloroplast, complete genome
50198865	NC_005878.2	Saccharum hybrid cultivar SP-80-3280 chloroplast, complete genome
50233947	NC_005973.1	Oryza nivara chloroplast, complete genome
50346761	NC_006050.1	Nymphaea alba chloroplast, complete genome
50812505	NC_006084.1	Saccharum officinarum chloroplast, complete genome
51209843	NC_006137.1	Gracilaria tenuistipitata var. liui chloroplast, complete genome
52220789	NC_006290.1	Panax ginseng chloroplast, complete genome
60117151	NC_006861.1	Huperzia lucidula chloroplast, complete genome
68164782	NC_007144.1	Cucumis sativus chloroplast, complete genome
71842220	NC_007288.1	Emiliania huxleyi chloroplast, complete genome
75755638	NC_007407.1	Acorus calamus plastid, complete genome
78103230	NC_007499.1	Phalaenopsis aphrodite subsp. formosana chloroplast, complete genome
78102509	NC_007500.1	Nicotiana sylvestris chloroplast, complete genome
81176229	NC_007578.1	Lactuca sativa chloroplast, complete genome
81301540	NC_007602.1	Nicotiana tomentosiformis chloroplast, complete genome
85816422	NC_007758.1	Theileria parva strain Muguga apicoplast, complete sequence
149384932	NC_007898.2	Solanum lycopersicum chloroplast, complete genome
90994377	NC_007932.1	Porphyra yezoensis chloroplast, complete genome
91214122	NC_007942.1	Glycine max chloroplast, complete genome
91208967	NC_007943.1	Solanum bulbocastanum chloroplast, complete genome
91208881	NC_007944.1	Gossypium hirsutum chloroplast, complete genome
91983971	NC_007957.1	Vitis vinifera chloroplast, complete genome
94502469	NC_007977.1	Helianthus annuus chloroplast, complete genome
294768541	NC_008096.2	Solanum tuberosum chloroplast, complete genome
108773196	NC_008097.1	Chara vulgaris chloroplast, complete genome
108773302	NC_008099.1	Oltmannsiellopsis viridis chloroplast, complete genome
108773396	NC_008100.1	Helicosporidium sp. ex Simulium jonesii plastid, complete genome
108773031	NC_008101.1	Scenedesmus obliquus chloroplast, complete genome
108796875	NC_008114.1	Pseudendoclonium akinetum chloroplast, complete genome
108802622	NC_008115.1	Eucalyptus globulus subsp. globulus chloroplast, complete genome
108796771	NC_008116.1	Staurastrum punctulatum chloroplast, complete genome
108796667	NC_008117.1	Zygnema circumcarinatum chloroplast, complete genome
109156581	NC_008155.1	Oryza sativa Indica Group chloroplast, complete genome
110227059	NC_008235.1	Populus alba chloroplast, complete genome
113170411	NC_008289.1	Ostreococcus tauri chloroplast, complete genome
114107112	NC_008325.1	Daucus carota chloroplast, complete genome
114107025	NC_008326.1	Liriodendron tulipifera chloroplast, complete genome
114329635	NC_008334.1	Citrus sinensis chloroplast, complete genome
114329725	NC_008335.1	Platanus occidentalis chloroplast, complete genome
114329947	NC_008336.1	Nandina domestica chloroplast, complete genome
114804244	NC_008359.1	Morus indica chloroplast, complete genome
115349964	NC_008372.1	Stigeoclonium helveticum chloroplast, complete genome
115391881	NC_008407.1	Jasminum nudiflorum chloroplast, complete genome
115443536	NC_008408.1	Bigelowiella natans plastid, complete genome
115531893	NC_008454.1	Pelargonium x hortorum chloroplast, complete genome
115604913	NC_008456.1	Drimys granadensis chloroplast, complete genome
115605001	NC_008457.1	Piper cenocladum chloroplast, complete genome
116617087	NC_008535.1	Coffea arabica chloroplast, complete genome
118410962	NC_008588.1	Phaeodactylum tricornutum chloroplast, complete genome
118411095	NC_008589.1	Thalassiosira pseudonana chloroplast, complete genome
118430366	NC_008590.1	Hordeum vulgare subsp. vulgare chloroplast, complete genome
118430280	NC_008591.1	Agrostis stolonifera chloroplast, complete genome
118614470	NC_008602.1	Sorghum bicolor chloroplast, complete genome
119368478	NC_008641.1	Gossypium barbadense chloroplast, complete genome
121720592	NC_008788.1	Nuphar advena chloroplast, complete genome
122893969	NC_008796.1	Ranunculus macranthus chloroplast, complete genome
124112035	NC_008822.1	Chlorokybus atmophyticus chloroplast, complete genome
124302880	NC_008829.1	Angiopteris evecta chloroplast, complete genome
134093177	NC_009143.1	Populus trichocarpa chloroplast, complete genome
139387430	NC_009259.1	Phaseolus vulgaris chloroplast, complete genome
139390328	NC_009265.1	Aethionema cordifolium chloroplast, complete genome
139389244	NC_009266.1	Aethionema grandiflorum chloroplast, complete genome
139389397	NC_009267.1	Olimarabidopsis pumila chloroplast, complete genome
139389622	NC_009268.1	Arabis hirsuta chloroplast, complete genome
139388073	NC_009269.1	Barbarea verna chloroplast, complete genome
139387231	NC_009270.1	Capsella bursa-pastoris chloroplast, complete genome
139389780	NC_009271.1	Crucihimalaya wallichii chloroplast, complete genome
139389930	NC_009272.1	Draba nemorosa chloroplast, complete genome
139388889	NC_009273.1	Lepidium virginicum chloroplast, complete genome
139390132	NC_009274.1	Lobularia maritima chloroplast, complete genome
139389075	NC_009275.1	Nasturtium officinale chloroplast, complete genome
149071965	NC_009573.1	Rhodomonas salina chloroplast, complete genome
149390247	NC_009598.1	Chloranthus spicatus chloroplast, complete genome
149390519	NC_009599.1	Buxus microphylla chloroplast, complete genome
149390421	NC_009600.1	Illicium oligandrum chloroplast, complete genome
149390334	NC_009601.1	Dioscorea elephantipes chloroplast, complete genome
150251435	NC_009618.1	Cycas taitungensis chloroplast, complete genome
153805558	NC_009681.1	Leptosira terrestris chloroplast, complete genome
156618891	NC_009765.1	Cuscuta gronovii chloroplast, complete genome
156618806	NC_009766.1	Cuscuta reflexa chloroplast, complete genome
157325509	NC_009808.1	Ipomoea purpurea chloroplast, complete genome
159106781	NC_009949.1	Cuscuta obtusiflora chloroplast, complete genome
159106843	NC_009950.1	Lolium perenne chloroplast, complete genome
159161139	NC_009962.1	Ceratophyllum demersum chloroplast, complete genome
159161233	NC_009963.1	Cuscuta exaltata chloroplast, complete genome
161622288	NC_010093.1	Acorus americanus chloroplast, complete genome
161784171	NC_010109.1	Lemna minor chloroplast, complete genome
167391784	NC_010323.1	Carica papaya chloroplast, complete genome
169142689	NC_010358.1	Oenothera argillicola chloroplast, complete genome
169142775	NC_010359.1	Aneura mirabilis chloroplast, complete genome
169142839	NC_010360.1	Oenothera glazioviana chloroplast, complete genome
169142924	NC_010361.1	Oenothera biennis chloroplast, complete genome
169143010	NC_010362.1	Oenothera parviflora chloroplast, complete genome
169794052	NC_010433.1	Manihot esculenta chloroplast, complete genome
170784721	NC_010442.1	Trachelium caeruleum chloroplast, complete genome
172072868	NC_010548.1	Cryptomeria japonica chloroplast, complete genome
183217719	NC_010601.1	Guizotia abyssinica chloroplast, complete genome
187763084	NC_010654.1	Welwitschia mirabilis chloroplast, complete genome
189095288	NC_010772.1	Heterosigma akashiwo chloroplast, complete genome
189162250	NC_010776.1	Fagopyrum esculentum subsp. ancestrale chloroplast, complete genome
194033264	NC_011031.1	Oedogonium cardiacum chloroplast, complete genome
194033128	NC_011032.1	Brachypodium distachyon chloroplast, complete genome
237688442	NC_011152.3	Picea sitchensis chloroplast, complete genome
237688507	NC_011153.3	Pinus contorta chloroplast, complete genome
237688575	NC_011154.3	Pinus gerardiana chloroplast, complete genome
237688643	NC_011155.3	Pinus krempfii chloroplast, complete genome
237598368	NC_011156.3	Pinus lambertiana chloroplast, complete genome
237598369	NC_011157.3	Pinus longaeva chloroplast, complete genome
237599370	NC_011158.3	Pinus monophylla chloroplast, complete genome
237600371	NC_011159.3	Pinus nelsonii chloroplast, complete genome
197294093	NC_011163.1	Cicer arietinum chloroplast, complete genome
209892870	NC_011395.1	Babesia bovis T2Bo apicoplast, complete genome
215400692	NC_011600.1	Vaucheria litorea chloroplast, complete genome
255961284	NC_011713.2	Festuca arundinacea chloroplast, complete genome
219673952	NC_011828.1	Trifolium subterraneum chloroplast, complete genome
222084058	NC_011930.1	Keteleeria davidiana chloroplast, complete genome
222084134	NC_011942.1	Gnetum parvifolium chloroplast, complete genome
222139869	NC_011954.1	Ephedra equisetina chloroplast, complete genome
223931033	NC_012052.1	Syntrichia ruralis chloroplast, complete genome
224179399	NC_012097.1	Pycnococcus provasolii chloroplast, complete genome
224178026	NC_012099.1	Pyramimonas parkeae chloroplast, complete genome
224179468	NC_012101.1	Monomastix sp. OKE-1 chloroplast, complete genome
225544104	NC_012224.1	Jatropha curcas chloroplast, complete genome
226968543	NC_012568.1	Micromonas pusilla CCMP1545 chloroplast, complete genome
226968641	NC_012575.1	Micromonas sp. RCC299 chloroplast, complete genome
229577732	NC_012615.1	Megaleranthis saniculifolia chloroplast, complete genome
242910132	NC_012818.1	Alsophila spinulosa chloroplast, complete genome
242620015	NC_012898.1	Aureococcus anophagefferens chloroplast, complete genome
242624258	NC_012903.1	Aureoumbra lagunensis chloroplast, complete genome
253729536	NC_012927.1	Bambusa oldhamii chloroplast, complete genome
254798615	NC_012978.1	Parachlorella kessleri chloroplast, complete genome
255961289	NC_013086.1	Selaginella moellendorffii plastid, complete genome
255961360	NC_013088.1	Dendrocalamus latiflorus chloroplast, complete genome
260677373	NC_013273.1	Coix lacryma-jobi chloroplast, complete genome
260780633	NC_013359.1	Bryopsis hypnoides chloroplast, complete genome
269100994	NC_013498.1	Ectocarpus siliculosus chloroplast, complete genome
281190713	NC_013553.1	Parthenium argentatum chloroplast, complete genome
283794864	NC_013703.1	Cryptomonas paramecium plastid, complete genome
283794947	NC_013707.1	Olea europaea chloroplast, complete genome
289065068	NC_013823.1	Typha latifolia chloroplast, complete genome
289066804	NC_013843.1	Vigna radiata chloroplast, complete genome
300388125	NC_013991.2	Phoenix dactylifera chloroplast, complete genome
295311711	NC_014056.1	Oncidium Gower Ramsey chloroplast, complete genome
295136975	NC_014057.1	Pisum sativum chloroplast, complete genome
295065706	NC_014062.1	Anomochloa marantoidea chloroplast, complete genome
295136900	NC_014063.1	Lathyrus sativus chloroplast, complete genome
299830295	NC_014267.1	Kryptoperidinium foliaceum chloroplast, complete genome
299830503	NC_014287.1	Durinskia baltica chloroplast, complete genome
301500842	NC_014340.1	Chromera velia chloroplast, complete genome
301500923	NC_014345.1	Alveolata sp. CCMP3155 chloroplast, complete genome
304322936	NC_014346.1	Floydiella terrestris chloroplast, complete genome
301353331	NC_014348.1	Pteridium aquilinum subsp. aquilinum chloroplast, complete genome
309322050	NC_014569.1	Erodium texanum plastid, complete genome
309322431	NC_014570.1	Eucalyptus grandis chloroplast, complete genome
309322129	NC_014573.1	Geranium palmatum plastid, complete genome
309322284	NC_014575.1	Cedrus deodara chloroplast, complete genome
309322207	NC_014582.1	Monsonia speciosa plastid, complete genome
309322360	NC_014589.1	Cathaya argyrophylla chloroplast, complete genome
308745983	NC_014592.1	Cheilanthes lindheimeri chloroplast, complete genome
313183972	NC_014674.1	Castanea mollissima chloroplast, complete genome
313199596	NC_014675.1	Isoetes flaccida chloroplast, complete genome
313199681	NC_014676.1	Theobroma cacao chloroplast, complete genome
313183801	NC_014697.1	Prunus persica chloroplast, complete genome
313183887	NC_014699.1	Equisetum arvense chloroplast, complete genome
317046152	NC_014807.1	Corynocarpus laevigata chloroplast, complete genome
315320467	NC_014808.1	Thalassiosira oceanica CCMP1005 chloroplast, complete genome
317134108	NC_014874.1	Rhizanthella gardneri plastid, complete genome
323148809	NC_015083.1	Erodium carvifolium chloroplast, complete genome
323149147	NC_015084.1	Coccomyxa sp. C-169 plastid, complete genome
323148885	NC_015104.1	Smilax china plastid, complete genome
323149061	NC_015113.1	Anthriscus cerefolium chloroplast, complete genome
323481965	NC_015139.1	Brassica rapa subsp. pekinensis chloroplast, complete genome
